# Supplementary material for: Outcomes of Extracorporeal Membrane Oxygenation for Acute Respiratory Distress Syndrome in COVID-19 Patients: A Propensity-Matched Analysis
Source: MDPI journal article supplement (doi:10.3390/jcm10122547), 2021-06-09
Supplement: s1 [file s1]

**Supplementary Table S1. Characteristics of the whole cohort prior to matching.**

|                                                                                  | <b>COVID (n=20)</b> | <b>NCOVID (n=105)</b> | <b>p-value</b> |
|----------------------------------------------------------------------------------|---------------------|-----------------------|----------------|
| Age (y)                                                                          | 57 (50-62)          | 54 (42-61)            | 0.182          |
| Female gender, n (%)                                                             | 6 (30)              | 37 (35)               | 1.000          |
| Weight (kg)                                                                      | 90 (80-100)         | 82 (71-100)           | 0.329          |
| Height (cm)                                                                      | 176 (170-185)       | 175 (165-181)         | 0.344          |
| BMI (kg/m <sup>2</sup> )                                                         | 28.2 (24.7-31.1)    | 27 (25-33)            | 0.617          |
| Pre-ECMO LOS in hospital (d)                                                     | 6 (4-16)            | 0 (0-1)               | 0.000*         |
| Coronary Artery Disease, n (%)                                                   | 1 (5)               | 16 (15)               | 0.467          |
| Prior Myocardial Infarction, n (%)                                               | 1 (5)               | 11 (10)               | 0.690          |
| <b>VA-ECMO n(%)</b>                                                              | <b>1 (5)</b>        | <b>38 (33)</b>        | <b>0.007</b>   |
| Arterial Hypertension, n (%)                                                     | 14 (70)             | 35 (33)               | 0.002*         |
| COPD, n (%)                                                                      | 3 (15)              | 17 (16)               | 1.000          |
| Diabetes mellitus type 2, n (%)                                                  | 7 (35)              | 16 (15)               | 0.048          |
| Pulmonary Hypertension, n (%)                                                    | 2 (10)              | 0 (0)                 | 0.022*         |
| Chronic kidney disease, n (%) <sup>†</sup>                                       | 2 (10)              | 10 (10)               | 0.000*         |
| Nicotine use, n (%)                                                              | 4 (20)              | 43 (41)               | 0.126          |
| Immunosuppressive medication, n (%)                                              | 1 (5)               | 16 (15)               | 0.467          |
| History of Malignancy, n (%)                                                     | 1 (5)               | 5 (5)                 | 1.000          |
| <b>Laboratory parameters</b>                                                     |                     |                       |                |
| pO <sub>2</sub> (mmHg)                                                           | 68 (54-72)          | 77 (60-116.5)         | 0.023*         |
| FiO <sub>2</sub> (percentage)                                                    | 60 (50-80)          | 82 (54-100)           | 0.036*         |
| Creatinine (mg/dL)                                                               | 1.2 (0.9–1.7)       | 1.07 (0.76-1.86)      | 0.091          |
| Bilirubin (mg/dL)                                                                | 0.6 (0.45–1.9)      | 0.56 (0.32-1.8)       | 0.054          |
| Hemoglobin (g/dL)                                                                | 9.8 (8.8–10.5)      | 10.5 (9.375-11.5)     | 0.105          |
| <b>Respiratory Extracorporeal Membrane Oxygenation Survival Prediction Score</b> |                     |                       |                |
| Total RESP Score                                                                 | 0 (-3-2)            | 2 (1-5)               | 0.003*         |
| Survival Prediction (percentage)                                                 | 57 (33-57)          | 57 (57-76)            | 0.001*         |
| PaCO <sub>2</sub> ≥75 mmHg, n (%)                                                | 6 (32)              | 23 (22)               | 1.000          |
| Peak inspiratory pressure ≥42cmH <sub>2</sub> O, n (%)                           | 0 (0)               | 1 (1)                 | 1.000          |
| <b>Outcomes</b>                                                                  |                     |                       |                |
| 90-day mortality, n (%) <sup>†</sup>                                             | 9 (45)              | 61 (58)               | 0.455          |
| ECMO duration (d)                                                                | 16 (11-23)          | 12 (7-20)             | 0.129          |
| Total LOS in hospital (d)                                                        | 29 (14-55)          | 29 (11-53)            | 0.638          |
| Thromboembolic Events, n (%)                                                     | 8 (40)              | 18 (17)               | 0.028*         |
| Pulmonary Artery Embolism                                                        | 6 (30)              | 5 (5)                 | 0.008*         |
| Peripheral Venous Thrombosis                                                     | 4 (20)              | 8 (8)                 | 0.121          |
| Peripheral Arterial Thrombosis                                                   | 1 (5)               | 5 (5)                 | 1.000          |
| Other Thromboembolic Events <sup>††</sup>                                        | 0 (0)               | 5 (5)                 | 1.000          |
| Major Bleeding Events, n (%)                                                     | 9 (45)              | 44 (42)               | 1.000          |
| Endobronchial                                                                    | 2 (11)              | 18 (17)               | 0.736          |
| Mucosal                                                                          | 3 (16)              | 6 (6)                 | 0.141          |
| Cannulation Side                                                                 | 2 (10)              | 19 (18)               | 0.526          |
| Gastrointestinal                                                                 | 2 (10)              | 2 (2)                 | 0.119          |
| Cerebral                                                                         | 0 (0)               | 4 (4)                 | 1.000          |
| Hemothorax                                                                       | 1 (5)               | 14 (13)               | 1.000          |

Continuous variables are presented as median and interquartile range (IQR). \*p values under 0.05 are significant and tagged with asterisks. Abbreviations: BMI—body mass index kg/m<sup>2</sup>; ECMO—extracorporeal membrane oxygenation; ICU—intensive care unit; LOS—length of stay; NCOVID—non-COVID; VV—venovenous; †Death during 90 days after initiation of ECMO therapy.

**Supplementary Table S2. Laboratory parameters.**

|                           | COVID (n=20)       | NCOVID (n=34)     | p-value |
|---------------------------|--------------------|-------------------|---------|
| <b>Hb (g/dl)</b>          |                    |                   |         |
| Pre-ECMO                  | 9.8 (8.8-10.5)     | 9.6 (8.9-11.4)    | 0.764   |
| 24h after ECMO-initiation | 9.6 (8.8-10.7)     | 9.8 (8.9-11)      | 0.536   |
| Pre-Explantation          | 9.7 (9.3-10.5)     | 9.6 (8.2-10.7)    | 0.447   |
| <b>Leucocytes (/nL)</b>   |                    |                   |         |
| Pre-ECMO                  | 13 (10-17)         | 11 (9-19)         | 0.558   |
| 24h after ECMO-initiation | 14 (10-19)         | 11.4 (7-14)       | 0.122   |
| Pre-Explantation          | 13 (8-18)          | 12 (6-14)         | 0.294   |
| <b>Platelet (G/L)</b>     |                    |                   |         |
| Pre-ECMO                  | 222 (165-395)      | 131 (87-214)      | 0.074   |
| 24h after ECMO-initiation | 205 (124-304)      | 106 (38-171)      | 0.05*   |
| Pre-Explantation          | 163 (96-208)       | 86 (54-120)       | 0.02*   |
| <b>PCT (percentage)</b>   |                    |                   |         |
| Pre-ECMO                  | 4 (2-6)            | 1 (0-6)           | 0.053   |
| 24h after ECMO-initiation | 4 (2-7)            | 2 (1-13)          | 0.266   |
| Pre-Explantation          | 6 (2-10)           | 2 (1-6)           | 0.054   |
| <b>aPTT (s)</b>           |                    |                   |         |
| Pre-ECMO                  | 30 (29-45)         | 32 (29-53)        | 0.174   |
| 24h after ECMO-initiation | 33 (29-40)         | 41 (31-52)        | 0.036*  |
| Pre-Explantation          | 41 (29-50)         | 39 (31-52)        | 0.767   |
| <b>INR (ratio)</b>        |                    |                   |         |
| Pre-ECMO                  | 1.3 (1.2-1.4)      | 1.1 (1-1.2)       | 0.899   |
| 24h after ECMO-initiation | 1.2 (1.1-1.4)      | 1.2 (1.1-1.2)     | 0.334   |
| Pre-Explantation          | 1.3 (1.2-1.7)      | 1.2 (1.1-1.4)     | 0.253   |
| <b>Fibrinogen (mg/dL)</b> |                    |                   |         |
| Pre-ECMO                  | 493 (454-704)      | 364 (276-490)     | 0.000*  |
| 24h after ECMO-initiation | 455 (322-470)      | 369 (308-475)     | 0.324   |
| Pre-Explantation          | 268 (223-414)      | 329 (256-386)     | 0.564   |
| <b>D-dimer (µg/dL)</b>    |                    |                   |         |
| Pre-ECMO                  | 4345 (1810-11806)  | 2400 (1782-7030)  | 0.253   |
| 24h after ECMO-initiation | 7591 (3878-15030)  | 3754 (2200-10000) | 0.065   |
| Pre-Explantation          | 24689 (8306-62398) | 3860 (2041-9658)  | 0.011*  |
| <b>ATIII (%)</b>          |                    |                   |         |
| Pre-ECMO                  | 70 (57-78)         | 58 (40-75)        | 0.155   |
| 24h after ECMO-initiation | 53 (45-66)         | 64 (48-77)        | 0.074   |
| Pre-Explantation          | 79 (66-89)         | 67 (56-90)        | 0.280   |
| <b>pfHb (mg/L)</b>        |                    |                   |         |
| Pre-ECMO                  | 36 (22-50)         | 48 (30-72)        | 0.162   |
| 24h after ECMO-initiation | 45 (35-70)         | 68 (44-138)       | 0.041*  |

|                           |               |                |       |
|---------------------------|---------------|----------------|-------|
| Pre-Explantation          | 80 (62-122)   | 120 (36-305)   | 0.775 |
| <b>LDH (U/L)</b>          |               |                |       |
| Pre-ECMO                  | 403 (312-578) | 466 (318-644)  | 0.589 |
| 24h after ECMO-initiation | 480 (405-560) | 515 (321-765)  | 0.937 |
| Pre-Explantation          | 513 (432-756) | 518 (344-1032) | 0.578 |
| <b>AST (U/L)</b>          |               |                |       |
| Pre-ECMO                  | 66 (38-140)   | 62 (32-164)    | 0.967 |
| 24h after ECMO-initiation | 65 (48-142)   | 59 (29-196)    | 0.900 |
| Pre-Explantation          | 86 (46-165)   | 88 (42-242)    | 0.831 |

All variables are presented as median and interquartile range (IQR). \*p values under 0.05 are significant and tagged with asterisks. Abbreviations: AST—aspartate transaminase; aPTT—partial thromboplastin time; ECMO—extracorporeal membrane oxygenation; fHb—free-plasma hemoglobin; Hb—hemoglobin; LDH—lactate dehydrogenase; LOS—length of stay; NCOVID—non-COVID; PCT—procalcitonin.

**Figure S1. Standardized absolute bias difference pre and post matching.**

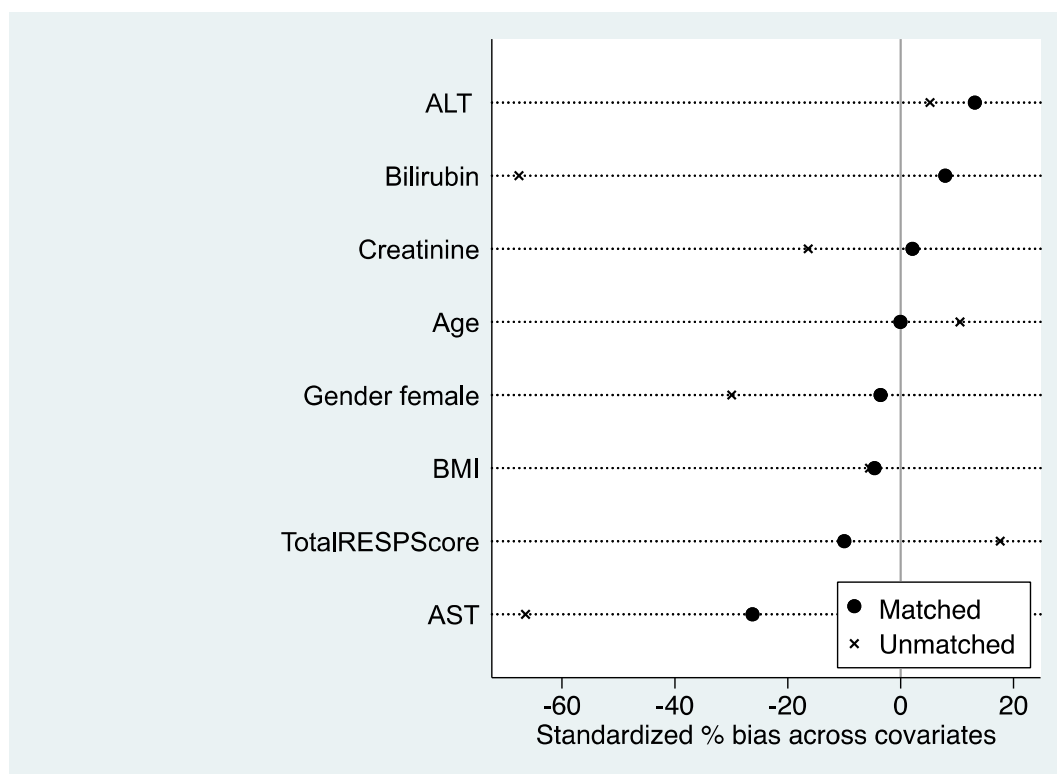

ALT—alanine aminotransferase U/L; AST—aspartate aminotransferase U/L; BMI—body mass index Kg/m<sup>2</sup>.

**Figure S2. Comparison of the time course of activated partial thromboplastin time (aPTT) between the COVID group and the NCOVID group.**

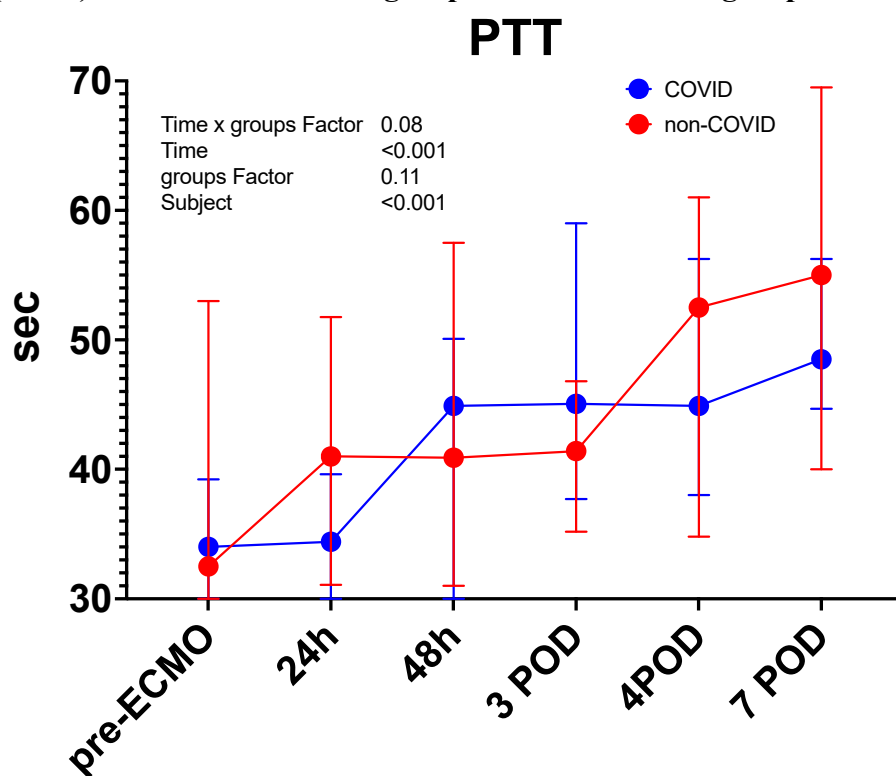

Comparison was performed with two way-ANOVA with adjusted *p*-values for repeated measurements. aPTT did not differ significantly between the two groups.
